# Supplementary material for: Gene transfer of MRCKα rescues lipopolysaccharide-induced acute lung injury by restoring alveolar capillary barrier function
Source: PubMed Central journal article supplement (PMC8531330; doi:10.1038/s41598-021-99897-3), 2021-10-21

Supplemental Figure 1. Full Western Blot Images for Figure 1.

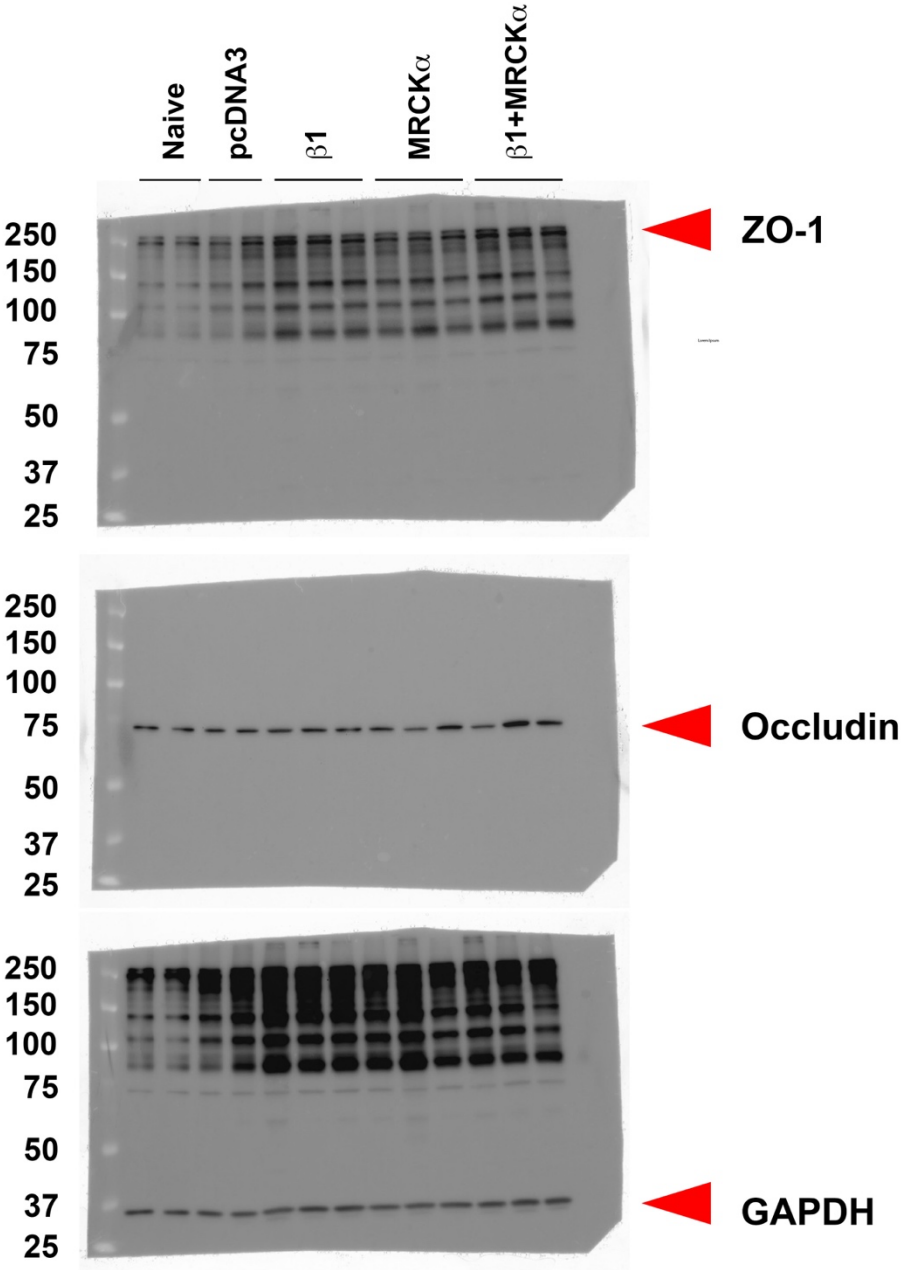

Supplemental Figure 2. Full Western Blots for Figure 3.

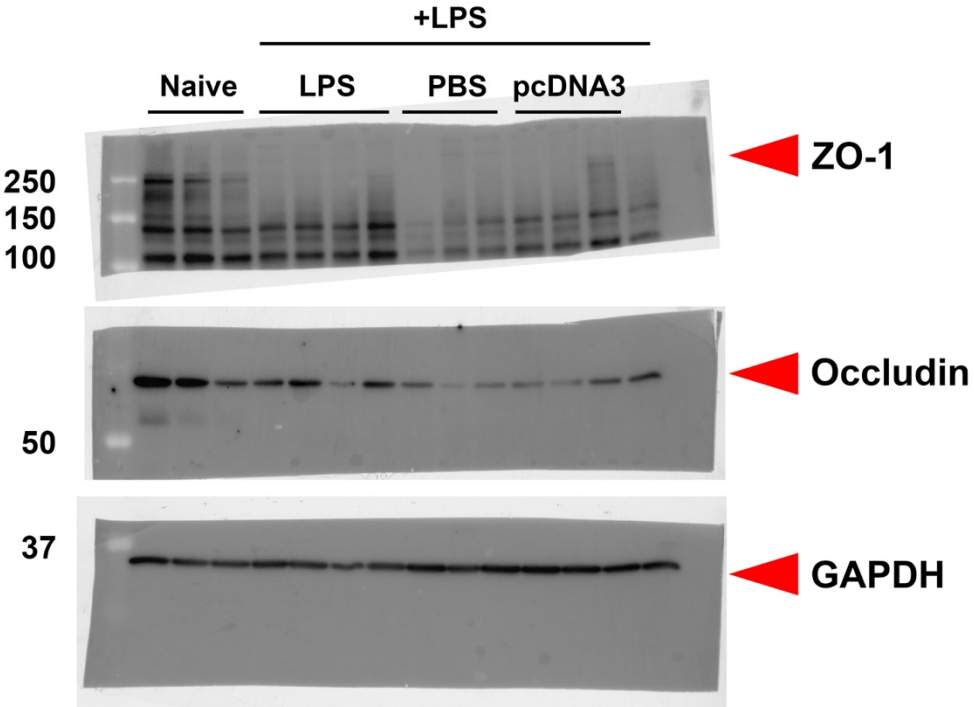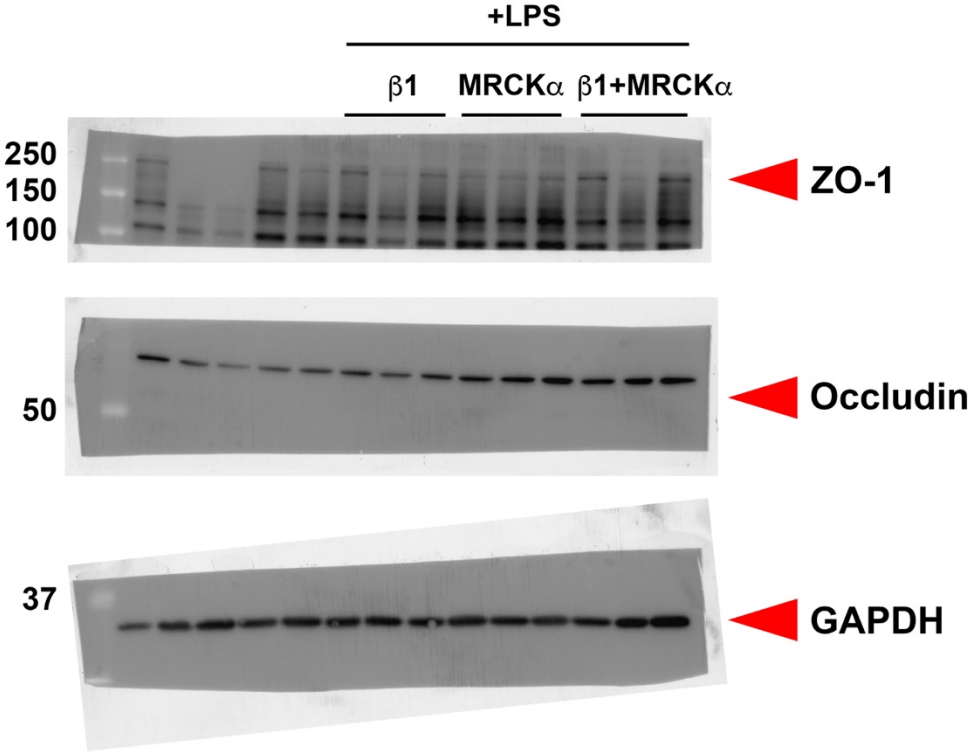

Supplement: 41598_2021_99897_MOESM1_ESM.pdf [file 41598_2021_99897_MOESM1_ESM.pdf]
